# Supplementary material for: Depth profiling of noble gases in ilmenite and olivine substrates
Source: Royal Society of Chemistry journal article supplement (doi:10.1039/d4ja00430b), 2025-01-01
Supplement: d4ja00430b2.xlsx [file d4ja00430b2.xlsx]

## Sheet: Sheet1
Table S1 Ion intensities of HNA-IL depth profiling.
Units of ion counts are cpms
Depth /nm	16O2+	48Ti4+	4He+	20Ne+	20Ne2+	22Ne2+	36Ar4+	40Ar2+	40Ar4+
Blank	0.030074	1e-06	1.6e-05	7e-06	6e-06	1e-06	0	0.000193	0.000152
1.4405	5.05763	0.0994267	0.0016	0.001	0.0006	0	0.0002	0.0176	0.0012
2.881	16.0237	1.45014	0.021	0.0055	0.0026	0.0003	0.0001	0.0399	0.0035
4.3215	25.8768	2.85038	0.0254	0.0103	0.0069	0.0009	0.0004	0.0552	0.0058
5.762	29.4	3.5112	0.0291	0.0127	0.0066	0.0005	0.0002	0.0479	0.0058
7.2025	30.388	3.92614	0.0319	0.0146	0.0083	0.0008	0.0007	0.0408	0.0053
8.643	30.7769	4.14695	0.035	0.0151	0.008	0.0007	0.0006	0.0399	0.0043
10.0835	30.4547	4.39569	0.0388	0.0202	0.0087	0.0018	0.0002	0.0394	0.0056
11.524	30.358	4.50724	0.0327	0.018	0.0096	0.0009	0.0006	0.0397	0.0075
12.9645	29.6793	4.64939	0.0384	0.0194	0.0102	0.0015	0.0004	0.0378	0.0069
14.405	29.2036	4.74771	0.0378	0.0225	0.0097	0.0016	0.001	0.0391	0.0096
15.8455	29.0087	4.75169	0.0433	0.0248	0.0115	0.0012	0.0012	0.0377	0.0088
17.286	28.8458	4.92455	0.0448	0.0248	0.014	0.0009	0.001	0.034	0.0111
18.7265	27.7695	4.8973	0.0448	0.0261	0.013	0.0018	0.0018	0.0367	0.0091
20.167	27.7581	4.9111	0.0533	0.0284	0.0167	0.0016	0.0012	0.0395	0.0124
21.6075	27.7002	4.96726	0.0568	0.0313	0.0153	0.0016	0.0018	0.0406	0.0117
23.048	27.4547	4.99102	0.0559	0.036	0.0183	0.002	0.0018	0.045	0.0162
24.4885	27.2256	5.04968	0.055	0.0357	0.0191	0.0015	0.0017	0.0501	0.0164
25.929	26.8316	4.98087	0.0518	0.0369	0.02	0.0014	0.0026	0.0481	0.0181
27.3695	26.7836	5.00005	0.0495	0.0366	0.0161	0.0017	0.0024	0.0509	0.02
28.81	26.9026	4.96591	0.0596	0.038	0.0183	0.002	0.0027	0.0527	0.0168
30.2505	27.0842	5.08976	0.0565	0.0406	0.0175	0.0019	0.002	0.0535	0.0211
31.691	26.9694	5.09508	0.0577	0.0435	0.0194	0.0019	0.0025	0.0555	0.0193
33.1315	26.7651	5.14076	0.0593	0.0437	0.0219	0.0026	0.0036	0.0568	0.0201
34.572	26.1656	5.06774	0.0635	0.0463	0.0229	0.0019	0.0025	0.0578	0.0219
36.0125	26.6089	5.28169	0.0722	0.0444	0.0241	0.003	0.0021	0.0589	0.0239
37.453	26.5232	5.19648	0.0699	0.0472	0.024	0.0031	0.0027	0.061	0.026
38.8935	26.4669	5.259	0.0747	0.0505	0.0258	0.0039	0.0027	0.0656	0.0275
40.334	26.3949	5.22761	0.0785	0.0552	0.0277	0.003	0.0036	0.0644	0.0245
41.7745	26.1218	5.13936	0.0784	0.0534	0.0292	0.0029	0.0032	0.0657	0.0256
43.215	26.3057	5.13569	0.081	0.0584	0.0298	0.0023	0.0023	0.0746	0.0294
44.6555	26.1476	5.03529	0.0848	0.0602	0.0281	0.0036	0.0032	0.07	0.0301
46.096	26.1729	5.10073	0.0903	0.0584	0.0293	0.0042	0.003	0.0686	0.032
47.5365	26.0112	5.1028	0.0937	0.056	0.0298	0.0041	0.0047	0.0731	0.0325
48.977	26.114	5.21912	0.0866	0.0623	0.0315	0.0048	0.0038	0.077	0.0312
50.4175	25.9589	5.16505	0.0995	0.0626	0.032	0.0037	0.0021	0.0771	0.0323
51.858	25.9073	5.26785	0.0974	0.0629	0.0316	0.0024	0.0036	0.0734	0.0321
53.2985	25.3939	5.02802	0.0989	0.0655	0.0318	0.0032	0.0039	0.0738	0.0318
54.739	25.4536	4.96863	0.1047	0.061	0.029	0.0034	0.0036	0.0763	0.0377
56.1795	25.3743	4.9085	0.1013	0.0629	0.0309	0.0039	0.0046	0.0738	0.0353
57.62	25.654	4.97882	0.1068	0.0632	0.0313	0.0033	0.0041	0.0794	0.031
59.0605	25.4467	4.9983	0.1121	0.0599	0.0294	0.0039	0.0041	0.0798	0.0325
60.501	25.4017	4.95211	0.1175	0.0576	0.0299	0.0042	0.0043	0.0742	0.0324
61.9415	25.1335	5.00146	0.1237	0.0612	0.0318	0.0039	0.0034	0.0714	0.0334
63.382	25.3421	5.13377	0.124	0.0614	0.0318	0.0035	0.0043	0.07	0.0327
64.8225	25.078	5.02172	0.1249	0.0623	0.0305	0.0035	0.0025	0.0707	0.0329
66.263	25.02	5.09222	0.1257	0.0588	0.0317	0.0031	0.003	0.0731	0.0341
67.7035	24.6557	4.98985	0.1379	0.0602	0.0283	0.0028	0.0033	0.0694	0.0342
69.144	24.5387	5.0442	0.1418	0.0584	0.0297	0.0043	0.0019	0.065	0.0313
70.5845	24.0633	4.91084	0.143	0.0506	0.0296	0.0027	0.0033	0.0695	0.0267
72.025	24.3947	4.99505	0.1573	0.0559	0.0291	0.0046	0.0037	0.0653	0.0278
73.4655	24.1723	4.88498	0.1544	0.0523	0.0277	0.0034	0.0028	0.0686	0.0281
74.906	23.5759	4.78434	0.1483	0.0531	0.0234	0.0021	0.0034	0.061	0.0257
76.3465	23.4431	4.6901	0.1497	0.0489	0.0252	0.003	0.0027	0.0599	0.0255
77.787	23.9837	4.77011	0.1468	0.0518	0.0251	0.0036	0.0035	0.0577	0.0243
79.2275	24.1235	4.6914	0.1522	0.0427	0.0242	0.002	0.0029	0.0583	0.0278
80.668	24.5446	4.75482	0.1662	0.0435	0.0216	0.0025	0.0032	0.0607	0.0241
82.1085	24.0066	4.69962	0.1483	0.0448	0.0237	0.0022	0.0017	0.0573	0.0205
83.549	23.6792	4.59544	0.158	0.0397	0.0193	0.0019	0.0012	0.0548	0.0195
84.9895	23.6672	4.72435	0.1621	0.0378	0.0203	0.0021	0.0038	0.0509	0.0212
86.43	23.9608	4.79945	0.1637	0.0424	0.0165	0.0024	0.0033	0.048	0.0204
87.8705	24.0228	4.80455	0.1666	0.0364	0.0173	0.0028	0.0025	0.0517	0.0199
89.311	24.1157	4.84823	0.1659	0.034	0.0181	0.0017	0.0023	0.0475	0.018
90.7515	23.9652	4.76239	0.1749	0.0323	0.0167	0.0012	0.0018	0.0521	0.0191
92.192	23.9717	4.82516	0.1734	0.0301	0.0141	0.0019	0.0016	0.052	0.016
93.6325	24.0296	4.81783	0.1769	0.0323	0.0164	0.001	0.0017	0.0421	0.0158
95.073	23.9665	4.81894	0.1806	0.0304	0.0136	0.0011	0.0016	0.042	0.0152
96.5135	23.7999	4.70115	0.1849	0.0271	0.0132	0.0018	0.0024	0.0402	0.0146
97.954	23.8796	4.69887	0.1815	0.0284	0.0098	0.0012	0.0011	0.0412	0.0143
99.3945	23.7817	4.66347	0.1739	0.0227	0.0118	0.0012	0.0013	0.0431	0.0151
100.835	23.6559	4.65354	0.1768	0.0242	0.0107	0.0008	0.0017	0.0388	0.0127
102.275	23.8014	4.71979	0.1773	0.0214	0.0113	0.0014	0.0014	0.0371	0.0118
103.716	23.4759	4.70287	0.1814	0.0183	0.0102	0.0012	0.0012	0.0404	0.0108
105.156	23.7016	4.76983	0.1829	0.0188	0.0082	0.0011	0.0016	0.0317	0.0099
106.597	23.5427	4.77936	0.1781	0.0173	0.0081	0.0004	0.0004	0.0359	0.0085
108.037	23.8091	4.88665	0.1735	0.0169	0.0072	0.0006	0.0008	0.0317	0.0094
109.478	23.3965	4.84947	0.1866	0.0129	0.0085	0.0006	0.0015	0.0341	0.0081
110.918	23.3716	4.80343	0.1792	0.0122	0.0079	0.0008	0.0003	0.0323	0.0073
112.359	23.6256	4.91858	0.1798	0.0123	0.007	0.0005	0.0008	0.0315	0.0076
113.799	23.4298	4.78195	0.1728	0.0123	0.0054	0.0007	0.0008	0.0305	0.0075
115.24	23.1397	4.6172	0.1709	0.011	0.006	0.001	0.0009	0.0287	0.0076
116.68	23.3407	4.61168	0.1655	0.0109	0.0057	0.0006	0.0001	0.0293	0.0056
118.121	23.458	4.66843	0.1616	0.0119	0.0046	0.0011	0.0006	0.0293	0.0043
119.561	23.3913	4.67694	0.1662	0.0073	0.0042	0.0006	0.0003	0.0278	0.0056
121.002	23.3986	4.67473	0.1506	0.0087	0.0034	0.0007	0.0003	0.0261	0.0047
122.442	23.4982	4.71781	0.1572	0.0077	0.0037	0.0005	0.0002	0.026	0.0043
123.883	23.4349	4.78014	0.148	0.0087	0.0028	0.0004	0.0008	0.0247	0.0043
125.323	23.5141	4.80955	0.1414	0.0068	0.0026	0	0.0003	0.0256	0.0039
126.764	23.3215	4.77911	0.1431	0.0085	0.0024	0.0003	0.0006	0.0242	0.0036
128.204	23.0744	4.72974	0.1395	0.0066	0.0028	0.0002	0.0003	0.0219	0.004
129.645	23.1569	4.73618	0.1293	0.0056	0.0027	0.0002	0.0003	0.0259	0.0027
131.085	23.0979	4.6106	0.122	0.0057	0.0018	0.0003	0.0003	0.0229	0.0036
132.526	23.2988	4.69272	0.1228	0.0044	0.0015	0.0003	0.0007	0.0218	0.003
133.966	23.2758	4.67284	0.1155	0.0039	0.0012	0.0003	0.0003	0.0242	0.0034
135.407	23.1136	4.66351	0.1094	0.0049	0.0012	0.0002	0.0003	0.0227	0.0021
136.847	23.3817	4.72291	0.103	0.0038	0.0013	0	0.0003	0.0212	0.0024
138.288	23.249	4.6656	0.1033	0.0048	0.001	0.0002	0.0005	0.0229	0.0025
139.728	23.2305	4.73527	0.0963	0.0029	0.0013	0.0001	0.0003	0.0227	0.0017
141.169	23.0464	4.62574	0.0844	0.0032	0.0012	0	0.0004	0.0209	0.0012
142.609	22.8243	4.55816	0.083	0.0036	0.0009	0.0001	0.0003	0.0225	0.0019
144.05	23.024	4.71757	0.0775	0.0025	0.0007	0.0001	0.0002	0.0219	0.0014
145.49	23.1143	4.71117	0.0743	0.0034	0.001	0.0003	0.0003	0.0234	0.0016
146.931	22.9092	4.60019	0.063	0.0026	0.001	0	0.0001	0.019	0.0016
148.371	22.9923	4.65951	0.0603	0.0036	0.001	0.0001	0.0001	0.0214	0.0021
149.812	22.9946	4.6519	0.0565	0.0035	0.0007	0.0001	0.0001	0.0192	0.0009
151.252	23.0549	4.65693	0.0513	0.0019	0.0007	0.0001	0.0001	0.0189	0.0013
152.693	23.0165	4.74379	0.0581	0.0021	0.0003	0.0001	0	0.0215	0.0009
154.133	22.8503	4.6931	0.0494	0.0019	0.0005	0	0.0001	0.0217	0.0007
155.574	23.1541	4.69881	0.0459	0.0023	0.0005	0	0.0001	0.0215	0.0008
157.014	22.9896	4.72786	0.0402	0.002	0.0008	0.0002	0	0.0206	0.0013
158.455	23.2267	4.72703	0.0398	0.002	0.0003	0.0001	0	0.0197	0.0008
159.895	23.0802	4.65786	0.0365	0.0022	0.0004	0	0.0001	0.0175	0.0012
161.336	22.9584	4.72568	0.0347	0.0026	0.0001	0	0	0.0189	0.0015
162.776	23.1188	4.73614	0.0293	0.0021	0.0002	0.0002	0	0.0201	0.0011
164.217	22.992	4.70801	0.027	0.002	0.0003	0	0.0002	0.018	0.0012
165.657	22.8791	4.67123	0.0236	0.0023	0.0002	0	0	0.0189	0.001
167.098	22.985	4.56869	0.024	0.0031	0.0001	0	0	0.0183	0.0007
168.538	23.2591	4.56932	0.0205	0.0019	0.0005	0	0.0002	0.0201	0.0006
169.979	23.0645	4.59537	0.0168	0.0018	0.0001	0.0001	0.0001	0.0192	0.0002
171.419	22.8931	4.59529	0.013	0.0018	0	0	0	0.0192	0.0006
172.86	22.9471	4.63804	0.013	0.0015	0.0003	0	0	0.0176	0.0007
174.3	22.9555	4.72249	0.0117	0.0018	0	0	0	0.0214	0.0012
175.741	22.9445	4.64609	0.0123	0.0016	0.0001	0	0	0.0214	0.0011
177.181	22.7338	4.72849	0.0103	0.0018	0	0	0	0.0195	0.0008
178.622	22.9738	4.72966	0.0092	0.0021	0.0001	0	0	0.0175	0.0006
180.062	22.8818	4.69727	0.0094	0.0028	0.0005	0	0	0.0213	0.001
181.503	22.7855	4.52937	0.0077	0.0015	0	0.0001	0	0.018	0.0006
182.944	22.979	4.60677	0.0071	0.0021	0.0001	0	0	0.0178	0.0007
184.384	22.9112	4.65463	0.0056	0.0013	0.0001	0.0001	0.0001	0.0182	0.0008
185.824	22.7368	4.6761	0.0059	0.002	0.0001	0	0	0.0192	0.0008
187.265	22.9856	4.6034	0.0037	0.0016	0	0.0001	0	0.0196	0.0003
188.705	22.9921	4.67201	0.0044	0.0017	0	0	0	0.0203	0.0001
190.146	23.2692	4.67195	0.0029	0.0015	0	0	0	0.0179	0.0003
191.586	23.0008	4.66694	0.0038	0.0021	0	0	0	0.02	0.0007
193.027	22.8397	4.67199	0.0026	0.0016	0	0	0	0.0194	0.0004
194.467	23.0961	4.75853	0.0025	0.0016	0	0	0	0.0201	0.0009
195.908	22.8918	4.7322	0.003	0.0016	0.0001	0	0	0.0185	0.0008
197.348	22.783	4.67477	0.0027	0.002	0	0	0	0.0192	0.0004
198.789	22.8643	4.64451	0.0025	0.0015	0.0001	0	0	0.0166	0.0005
200.229	23.0019	4.60055	0.002	0.0011	0.0001	0	0	0.0194	0.0005
201.67	22.7907	4.6034	0.0014	0.0014	0.0001	0	0.0001	0.0184	0.0003
203.11	22.8417	4.58643	0.0014	0.0011	0	0	0	0.0193	0.0004
204.551	22.7483	4.63595	0.0019	0.0015	0	0	0.0001	0.018	0.0002
205.991	23.108	4.71039	0.0004	0.0014	0.0001	0	0.0001	0.0194	0.0005
207.432	22.9021	4.61292	0.0009	0.0015	0	0	0	0.0199	0.001
208.872	22.9768	4.6296	0.0009	0.0013	0.0001	0	0	0.0181	0.0005
210.313	22.8004	4.57907	0.0009	0.0014	0	0	0.0001	0.0208	0.0006
211.753	22.9316	4.42574	0.0006	0.0014	0	0	0	0.0168	0.0006
213.194	22.6503	4.37796	0.0005	0.0008	0	0	0.0002	0.0193	0.001
214.634	22.7872	4.51734	0.0007	0.0022	0	0	0	0.02	0.0006
216.075	22.6433	4.45544	0.0005	0.0017	0.0001	0	0.0001	0.0192	0.0008
217.515	22.8718	4.51368	0.0002	0.0018	0.0001	0	0.0001	0.018	0.001
218.956	22.716	4.57507	0.0002	0.0016	0	0	0	0.0214	0.0003
220.396	22.7354	4.68849	0.0006	0.0018	0.0001	0	0	0.0183	0.0009
221.837	22.9558	4.65964	0.0002	0.0024	0	0	0.0002	0.0186	0.0004
223.277	22.7076	4.67935	0.0003	0.0012	0	0	0	0.0187	0.0003
224.718	22.7547	4.77187	0.0003	0.0013	0	0	0	0.0193	0.0009
226.158	22.6552	4.67582	0.0008	0.0012	0	0	0	0.0174	0.0004
227.599	22.4627	4.54369	0.0004	0.0016	0.0001	0	0	0.0169	0.0004
229.039	22.4814	4.48808	0.0003	0.0016	0	0	0	0.0188	0.0004
230.48	22.7094	4.50012	0.0004	0.0018	0	0	0.0001	0.0217	0.0007
231.92	22.5982	4.44926	0.0005	0.0014	0	0	0.0001	0.0194	0.0006
233.361	22.6467	4.48717	0.0003	0.0021	0.0001	0	0	0.0188	0.0008
234.801	22.8007	4.56505	0.0001	0.0014	0	0	0	0.0198	0.0004
236.242	22.6098	4.57905	0.0002	0.001	0	0	0	0.0201	0.0004
237.682	22.9362	4.62913	0.0001	0.001	0.0001	0	0	0.0208	0.0009
239.123	22.4817	4.62014	0.0003	0.0016	0	0	0.0001	0.0185	0.0006
240.563	23.7455	4.95275	0.0001	0.0013	0	0	0	0.0185	0.001
242.004	23.9496	5.00067	0.0003	0.0018	0.0001	0	0.0001	0.0199	0.0003
243.444	23.6477	4.96985	0.0003	0.0014	0.0001	0	0	0.0216	0.0006
244.885	23.7478	4.83387	0.0003	0.0018	0	0.0001	0	0.0183	0.0012
246.325	23.3857	4.84917	0.0001	0.0014	0.0001	0	0	0.0188	0.0007
247.766	23.8368	4.8629	0.0002	0.0025	0	0	0	0.0184	0.0011
249.206	23.2609	4.85092	0.0004	0.0017	0.0001	0	0	0.0184	0.0007
250.647	23.5372	4.87261	0.001	0.0019	0	0.0001	0	0.0203	0.0015
252.087	23.6124	4.82067	0.0003	0.0016	0	0	0	0.0197	0.0007
253.528	23.446	4.64745	0.0002	0.0016	0.0001	0	0	0.0187	0.0017
254.968	23.4802	4.7717	0.0001	0.0014	0	0	0.0001	0.0197	0.0005
256.409	23.291	4.74691	0.0003	0.0024	0.0001	0	0.0001	0.0197	0.0011
257.849	23.3918	4.7164	0.0003	0.0013	0	0	0	0.0179	0.0006
259.29	23.1933	4.72447	0.0002	0.0014	0	0	0	0.0179	0.0004
260.731	23.186	4.79389	0.0001	0.0017	0	0	0	0.0215	0.0008
262.171	23.14	4.79792	0.0001	0.0012	0	0	0	0.0194	0.0007
263.611	22.6007	4.70354	0.0001	0.0017	0.0001	0	0.0001	0.016	0.0015
265.052	23.0646	4.81856	0.0001	0.0016	0	0	0	0.0181	0.0008
266.493	21.4517	4.45571	0.0005	0.0032	0	0	0	0.0162	0.0007
267.933	22.8992	4.72421	0.0001	0.0022	0	0	0	0.0184	0.0011
269.373	22.728	4.6728	0.0004	0.0012	0	0	0	0.0191	0.0009
270.814	22.9091	4.74798	0.0003	0.0013	0	0	0.0002	0.0191	0.001
272.255	22.6892	4.6013	0	0.001	0	0	0.0001	0.0194	0.0008
273.695	22.6332	4.62148	0	0.0011	0.0001	0	0.0002	0.0199	0.0008
275.135	22.7883	4.62086	0	0.0021	0.0001	0	0	0.0201	0.0006
276.576	22.4102	4.53678	0	0.0017	0	0	0	0.0195	0.0006
278.016	22.7553	4.52142	0	0.0017	0	0.0001	0	0.0173	0.001
279.457	22.7778	4.63146	0.0003	0.0013	0.0001	0	0.0001	0.0182	0.0003
280.897	22.7485	4.64306	0.0002	0.0018	0	0	0	0.0186	0.0011
282.338	22.7594	4.70881	0.0001	0.0011	0.0001	0	0	0.0182	0.0006
283.778	22.5068	4.59567	0.0001	0.0013	0	0	0	0.0188	0.0008
285.219	22.3973	4.55124	0.0001	0.0017	0	0	0	0.0166	0.001
286.659	22.2477	4.52456	0	0.0019	0	0	0.0001	0.0194	0.0006
288.1	22.6485	4.58284	0.0001	0.0017	0	0	0	0.0206	0.0008
289.54	22.459	4.57447	0.0002	0.0015	0	0	0	0.0213	0.0008
290.981	22.2252	4.62594	0.0003	0.0026	0	0.0001	0.0001	0.0185	0.0011
292.421	22.5743	4.5994	0.0001	0.0016	0.0001	0	0	0.0198	0.0003
293.862	22.5969	4.59866	0.0002	0.001	0.0001	0	0.0001	0.0204	0.0005
295.302	22.6651	4.60847	0.0003	0.0018	0.0001	0	0	0.0193	0.0008
296.743	22.6715	4.61481	0	0.0011	0	0	0	0.0187	0.0007
298.183	22.6436	4.55309	0.0001	0.0017	0	0	0	0.0181	0.0003
299.624	22.7578	4.57005	0.0003	0.0021	0	0	0	0.0201	0.0005
301.064	22.456	4.60635	0.0001	0.0018	0	0	0	0.0176	0.0006
302.505	21.7446	4.36999	0	0.0016	0	0	0	0.0208	0.0002
303.945	22.2641	4.52723	0.0002	0.0018	0	0	0	0.0199	0.0003
305.386	22.5468	4.535	0.0002	0.0031	0	0	0	0.0199	0.001
306.826	22.3283	4.45308	0.0001	0.0016	0.0001	0	0	0.0191	0.0008
308.267	22.4377	4.52308	0.0002	0.0024	0	0	0	0.0179	0.0007
309.707	22.3059	4.54668	0	0.0012	0	0	0.0001	0.0199	0.0003
311.148	22.281	4.50178	0.0002	0.0018	0	0	0.0001	0.0182	0.0003
312.588	22.4138	4.52886	0.0005	0.0022	0	0	0.0001	0.0194	0.0012
314.029	22.6087	4.42481	0.0003	0.0019	0.0001	0	0.0001	0.0194	0.0005
315.469	22.4329	4.48478	0	0.0013	0.0001	0	0.0001	0.0182	0.0003
316.91	22.0366	4.40302	0.0002	0.0013	0	0.0001	0.0001	0.02	0.0007
318.35	21.8675	4.42004	0.0002	0.001	0.0001	0	0.0002	0.0184	0.0003
319.791	21.0195	4.27378	0.0001	0.0022	0	0	0	0.0165	0.0009
321.231	21.9954	4.50763	0.0001	0.0026	0.0001	0	0.0001	0.0199	0.0007
322.672	22.0791	4.54182	0	0.0013	0	0	0	0.0184	0.0009
324.112	22.0636	4.57064	0.0002	0.0019	0	0	0	0.02	0.0004
325.553	22.2513	4.56636	0	0.0012	0	0	0.0001	0.0186	0.0009
326.993	21.4433	4.40602	0.0002	0.0019	0.0001	0	0	0.0175	0.0003
328.434	22.1912	4.53384	0.0002	0.0015	0	0	0.0001	0.0194	0.0005
329.874	22.08	4.41995	0.0001	0.0021	0	0	0	0.0174	0.0007
331.315	21.9136	4.22251	0.0001	0.0016	0	0	0	0.0193	0.0003
332.755	22.198	4.29769	0	0.0018	0	0	0	0.0197	0.0009
334.196	22.0379	4.3322	0.0001	0.0014	0	0	0	0.0185	0.001
335.636	22.1554	4.40452	0	0.0012	0	0	0.0001	0.0174	0.0006
337.077	21.7232	4.39761	0.0001	0.0009	0.0001	0	0.0001	0.0183	0.0008
338.517	22.116	4.50031	0	0.0017	0	0	0	0.0181	0.0008
339.958	21.4971	4.38423	0.0001	0.0012	0.0001	0	0.0001	0.0168	0.0006
341.398	21.994	4.45545	0.0002	0.0009	0.0001	0	0	0.0178	0.0005
342.839	21.6389	4.49626	0	0.0011	0.0002	0	0.0001	0.0162	0.0008
344.279	21.0459	4.26512	0.0004	0.0021	0.0002	0	0	0.0166	0.0007
345.72	21.938	4.30312	0.0001	0.0015	0	0	0.0001	0.0179	0.0006
347.16	22.0415	4.3028	0	0.0017	0	0	0	0.0167	0.0004
348.601	22.0339	4.40673	0	0.0012	0.0001	0	0	0.021	0.0011
350.041	21.7203	4.31359	0.0001	0.0012	0	0	0	0.0178	0.0006
351.482	21.1636	4.30366	0.0002	0.0015	0	0	0	0.0195	0.0007
352.922	21.5142	4.36658	0.0001	0.0018	0	0	0.0001	0.0185	0.0004
354.363	21.5213	4.34217	0.0004	0.002	0	0	0.0001	0.0195	0.0005
355.803	21.4437	4.36101	0.0001	0.001	0	0	0	0.0188	0.0009
357.244	20.8681	4.25296	0	0.0014	0.0001	0	0	0.0185	0.0007
358.684	21.7151	4.41688	0.0002	0.0018	0	0	0.0001	0.0189	0.001
360.125	21.7652	4.38159	0	0.0013	0	0	0.0003	0.02	0.0007
361.565	21.5962	4.37026	0.0003	0.0017	0	0	0	0.0185	0.0004
363.006	21.6439	4.31838	0	0.0015	0	0	0	0.0183	0.0006
364.446	21.186	4.24587	0	0.0021	0	0	0	0.0156	0.0004
365.887	21.5227	4.32527	0.0001	0.0018	0	0	0	0.0187	0.0004
367.327	21.3234	4.32809	0.0002	0.0012	0.0001	0	0	0.0188	0.0014
368.768	21.5349	4.42911	0	0.0017	0.0001	0	0	0.0179	0.0004
370.208	21.6788	4.36579	0.0001	0.0011	0	0	0	0.0175	0.0005
371.649	21.3329	4.25697	0.0001	0.0021	0	0	0.0001	0.0199	0.0014
373.089	21.2183	4.33414	0.0001	0.0014	0	0	0	0.019	0.0007
374.53	21.4447	4.27077	0	0.0012	0.0001	0	0	0.0194	0.001
375.97	21.3986	4.26027	0.0003	0.0022	0	0	0	0.017	0.0003
377.411	20.6678	4.15281	0	0.0028	0.0001	0	0	0.016	0.0013
378.851	21.0344	4.28462	0.0001	0.002	0	0	0.0002	0.0192	0.0008
380.292	21.1852	4.36014	0	0.0022	0	0	0	0.0173	0.0005
381.732	20.8229	4.18256	0.0003	0.001	0	0	0	0.0198	0.0004
383.173	21.1161	4.21044	0	0.0023	0	0	0.0001	0.019	0.0008
384.613	21.2851	4.24189	0.0001	0.0013	0	0	0	0.0199	0.0009
386.054	20.6449	4.07416	0.0002	0.0022	0	0.0001	0	0.0183	0.0006
387.494	21.1164	4.21233	0.0003	0.0013	0	0	0.0001	0.018	0.0008
388.935	21.0724	4.24476	0	0.0013	0.0001	0	0	0.0201	0.0007
390.375	21.0184	4.29655	0	0.0018	0	0	0	0.0141	0.0007
391.816	20.2736	4.18525	0.0002	0.0022	0	0	0	0.018	0.0005
393.256	20.9665	4.28153	0	0.0016	0	0	0	0.0175	0.0009
394.697	19.5863	4.00221	0	0.0025	0	0	0	0.0176	0.0011
396.137	20.8879	4.12516	0.0001	0.0018	0	0	0.0001	0.0167	0.0006
397.578	20.8948	4.03693	0.0002	0.0017	0	0	0	0.0176	0.0007
399.018	20.7207	4.03697	0	0.0016	0	0	0.0002	0.0172	0.0008
400.459	20.9244	4.08784	0	0.0019	0	0	0	0.0189	0.0003
401.899	20.5579	4.04011	0	0.0015	0	0	0	0.0174	0.0006
403.34	20.891	4.14714	0.0004	0.0011	0	0	0	0.0178	0.0005
404.78	20.5154	4.11469	0.0004	0.0019	0	0	0.0001	0.0183	0.0012
406.221	20.6185	4.14555	0.0001	0.0019	0	0	0	0.0184	0.0005
407.661	20.5931	4.14289	0.0002	0.0009	0	0	0	0.0184	0.0006
409.102	20.4699	4.07633	0	0.002	0.0001	0	0.0002	0.0166	0.0008
410.542	20.4158	4.03038	0.0001	0.0011	0	0	0	0.0185	0.0006
411.983	20.3577	4.06052	0	0.0012	0	0	0.0002	0.0178	0.0008
413.423	20.0852	4.01625	0.0001	0.0022	0.0001	0	0	0.0145	0.0007
414.864	20.3474	4.11083	0	0.0014	0	0	0	0.0188	0.0003
416.304	19.6754	4.00293	0.0001	0.003	0	0	0	0.0171	0.0003
417.745	20.0419	4.06164	0.0001	0.0018	0	0	0.0001	0.0151	0.0004
419.185	20.3027	4.06394	0.0001	0.0011	0.0001	0	0	0.0182	0.0005
420.626	19.8501	3.97807	0.0001	0.0013	0	0	0	0.0177	0.0006
422.066	20.3206	4.04684	0	0.0023	0	0.0001	0.0001	0.0178	0.0013
423.507	20.0399	3.97772	0.0002	0.0011	0	0	0	0.0168	0.0003
424.947	19.687	3.93601	0	0.0015	0	0	0	0.0167	0.0002
426.388	19.7761	3.93912	0.0001	0.0016	0	0	0.0001	0.0173	0.0009
427.828	19.8182	3.89751	0.0002	0.001	0	0.0002	0.0002	0.0156	0.0006
429.269	19.9193	3.91529	0	0.002	0	0	0	0.0184	0.0007
430.709	20.0074	3.92422	0.0003	0.0019	0.0001	0	0.0001	0.0154	0.0004
432.15	19.7462	3.8368	0	0.002	0	0	0	0.018	0.0004
433.59	19.0525	3.72427	0.0001	0.0023	0.0001	0	0	0.014	0.0012
435.031	19.6709	3.93421	0.0001	0.0012	0	0	0.0001	0.0168	0.0009
436.471	19.7194	3.85323	0.0002	0.0018	0	0	0.0001	0.0182	0.0005
437.912	19.3652	3.82356	0.0001	0.0025	0.0002	0	0	0.0192	0.001
439.352	19.9184	3.98047	0	0.0014	0	0	0	0.0182	0.0007
440.793	19.3509	3.79017	0.0004	0.0016	0	0	0.0001	0.0159	0.0003
442.233	19.9119	3.90777	0.0004	0.0017	0	0	0.0001	0.0165	0.0004
443.674	19.9421	3.90243	0	0.0015	0.0001	0	0.0001	0.0162	0.0005
445.114	19.5494	3.81917	0.0002	0.0013	0.0001	0.0001	0	0.0136	0.0007
446.555	19.2846	3.72605	0.0001	0.0015	0	0	0	0.017	0.0006
447.995	19.6231	3.82356	0.0001	0.0013	0.0001	0	0.0002	0.018	0.0006
449.436	18.7474	3.68368	0.0002	0.0032	0	0	0	0.0159	0.0009
450.876	19.474	3.73047	0	0.0019	0	0	0	0.0172	0.0008
452.317	19.3885	3.73681	0.0001	0.0009	0	0	0	0.0176	0.0005
453.757	19.0105	3.70512	0	0.0018	0	0	0	0.017	0.0004
455.198	19.3681	3.78082	0.0001	0.0016	0	0	0.0001	0.017	0.0004
456.638	19.2331	3.67988	0.0001	0.0021	0	0	0.0002	0.0172	0.0008
458.079	18.706	3.68066	0.0002	0.0042	0.0002	0	0.0001	0.0159	0.0005
459.519	19.0786	3.72869	0	0.0008	0	0	0	0.0163	0.0001
460.96	18.6985	3.63752	0.0003	0.0022	0	0	0	0.0191	0.001
