# Supplementary material for: Depth profiling of noble gases in ilmenite and olivine substrates
Source: Royal Society of Chemistry journal article supplement (doi:10.1039/d4ja00430b), 2025-01-01
Supplement: d4ja00430b3.xlsx [file d4ja00430b3.xlsx]

## Sheet: Sheet1
Table S2 Ion intensities of HNA-OL depth profiling.
Units of ion counts are cpms
Depth /nm	16O2+	28Si+	4He+	20Ne+	20Ne2+	22Ne2+	36Ar4+	40Ar2+	40Ar4+
Blank	0.004335	5e-06	3e-05	5e-06	5e-06	0	0	0.000225	0.000143
0.8864	3.10848	0.496674	0.0015	0.0014	0.0001	0	0.0001	0.0271	0.0034
1.7728	9.89892	1.30399	0.0073	0.0044	0.0008	0	0.0001	0.048	0.0071
2.6592	19.8195	2.54958	0.0122	0.0085	0.0013	0	0	0.0472	0.0124
3.5456	23.3378	3.2007	0.0148	0.0093	0.0013	0.0001	0.0002	0.0566	0.0167
4.432	25.3006	3.52138	0.0144	0.0081	0.0023	0.0001	0.0002	0.0526	0.0162
5.3184	25.6609	3.77112	0.0141	0.0128	0.0026	0.0005	0	0.0502	0.0199
6.2048	25.5295	3.86976	0.0137	0.0122	0.0024	0.0005	0	0.0525	0.0205
7.0912	25.6036	4.01943	0.0164	0.0125	0.0028	0.0005	0.0001	0.0604	0.0176
7.9776	25.2444	4.08108	0.0143	0.0132	0.0036	0.0002	0	0.0578	0.0156
8.864	24.8801	4.06131	0.017	0.0179	0.003	0.0008	0.0002	0.0553	0.0161
9.7504	24.2605	3.98579	0.0207	0.0163	0.0037	0.001	0.0004	0.0581	0.0198
10.6368	24.6702	4.19987	0.0187	0.015	0.0037	0.0002	0.0002	0.0598	0.0154
11.5232	24.8575	4.15907	0.0204	0.0151	0.0044	0.0004	0.0004	0.0601	0.0184
12.4096	24.6253	4.15958	0.0238	0.017	0.0029	0.0004	0.0005	0.0622	0.0201
13.296	24.3963	4.12783	0.019	0.0178	0.0056	0.0006	0.0003	0.0609	0.0208
14.1824	24.4838	4.15099	0.02	0.0179	0.0047	0.0007	0.0006	0.0637	0.0217
15.0688	24.4783	4.10265	0.0236	0.018	0.0051	0.0007	0.0005	0.0668	0.0227
15.9552	24.625	4.02157	0.0212	0.0198	0.0054	0.0005	0.0006	0.0637	0.0268
16.8416	24.5775	3.99009	0.0252	0.0209	0.005	0.0006	0.0003	0.0606	0.022
17.728	24.4249	3.98381	0.0266	0.0216	0.0049	0.0009	0.0005	0.0666	0.0231
18.6144	24.4431	4.01747	0.0249	0.0217	0.0065	0.0006	0.0006	0.0672	0.0219
19.5008	24.4491	3.99136	0.0261	0.0236	0.0081	0.0007	0.0006	0.0687	0.023
20.3872	24.4684	4.01651	0.0282	0.0246	0.0082	0.0015	0.0005	0.0662	0.0221
21.2736	24.3883	4.01606	0.0296	0.0256	0.007	0.0008	0.0008	0.0717	0.0256
22.16	24.3397	3.94161	0.0294	0.0236	0.0096	0.0006	0.0009	0.0702	0.0263
23.0464	24.2917	3.92591	0.0333	0.0268	0.0093	0.0013	0.0005	0.0714	0.0218
23.9328	24.162	3.94254	0.0311	0.0297	0.0096	0.0013	0.0008	0.077	0.0234
24.8192	23.605	3.833	0.0322	0.0305	0.0114	0.0011	0.0012	0.0687	0.0248
25.7056	24.2879	3.9475	0.0421	0.0322	0.0113	0.0008	0.0007	0.0796	0.0238
26.592	24.104	3.96874	0.0369	0.0284	0.0114	0.0013	0.001	0.0771	0.0289
27.4784	24.0393	3.98043	0.0378	0.0342	0.0111	0.0015	0.0007	0.0756	0.03
28.3648	23.9151	4.01095	0.0396	0.0294	0.0112	0.0015	0.0011	0.0788	0.0288
29.2512	24.1274	4.04913	0.0455	0.0324	0.0124	0.0006	0.0005	0.0751	0.0291
30.1376	23.9061	3.9838	0.0423	0.0344	0.013	0.0018	0.0014	0.0809	0.028
31.024	23.7774	4.01683	0.0482	0.0339	0.0136	0.0013	0.0008	0.0732	0.0284
31.9104	24.073	3.99628	0.049	0.0371	0.0126	0.0018	0.0013	0.0792	0.0267
32.7968	24.053	3.95897	0.0469	0.0369	0.0146	0.0018	0.0011	0.083	0.0337
33.6832	23.7387	3.98921	0.0471	0.0366	0.0134	0.0022	0.0012	0.0755	0.0326
34.5696	23.7372	3.9821	0.0486	0.038	0.0158	0.0018	0.0018	0.0814	0.0326
35.456	23.886	3.95262	0.0552	0.0426	0.016	0.0017	0.0014	0.0822	0.0362
36.3424	23.1681	3.86019	0.0574	0.0375	0.017	0.0014	0.0021	0.0841	0.0265
37.2288	23.67	3.90696	0.0579	0.0437	0.0201	0.0024	0.0014	0.0812	0.0321
38.1152	23.6732	3.90034	0.0659	0.0468	0.0177	0.0025	0.0012	0.0813	0.0357
39.0016	23.6509	3.88641	0.0641	0.0444	0.0162	0.0023	0.0017	0.0879	0.0321
39.888	23.7675	3.93154	0.0636	0.042	0.0168	0.0015	0.0018	0.0883	0.0301
40.7744	23.5456	3.86914	0.0677	0.0436	0.0189	0.0019	0.0021	0.088	0.0315
41.6608	22.7859	3.73497	0.0684	0.0498	0.0195	0.0025	0.001	0.0817	0.0283
42.5472	23.527	3.87357	0.0676	0.0434	0.0214	0.002	0.0027	0.0934	0.034
43.4336	23.3249	3.89537	0.0705	0.0447	0.0178	0.0023	0.0027	0.0908	0.0339
44.32	23.4256	3.86055	0.0786	0.0434	0.0184	0.0026	0.0023	0.0824	0.0348
45.2064	23.0447	3.80555	0.0784	0.0501	0.0181	0.0025	0.0017	0.0895	0.0331
46.0928	23.2942	3.81284	0.0809	0.0495	0.0191	0.0028	0.0017	0.0903	0.0341
46.9792	23.2118	3.78655	0.0829	0.0502	0.0226	0.0019	0.0021	0.0867	0.0335
47.8656	22.8549	3.74962	0.0885	0.0472	0.0205	0.0027	0.0013	0.0875	0.0319
48.752	22.5761	3.71574	0.0955	0.0474	0.0213	0.0025	0.0019	0.0971	0.0309
49.6384	23.0128	3.83049	0.0935	0.0469	0.0217	0.0024	0.0022	0.0885	0.033
50.5248	22.7411	3.83083	0.0826	0.0476	0.0183	0.0018	0.0012	0.0828	0.0352
51.4112	22.8903	3.76904	0.0896	0.0437	0.0184	0.0025	0.0022	0.0919	0.0316
52.2976	22.2069	3.74974	0.0903	0.0451	0.019	0.0026	0.0028	0.0845	0.036
53.184	21.4016	3.60334	0.0919	0.0471	0.0173	0.002	0.0022	0.0795	0.0333
54.0704	22.4625	3.67998	0.0971	0.0432	0.0189	0.002	0.0026	0.0849	0.0349
54.9568	22.4514	3.65172	0.1048	0.0465	0.0191	0.0022	0.001	0.0882	0.0327
55.8432	22.4602	3.67032	0.1047	0.0464	0.0182	0.0013	0.0023	0.0851	0.0308
56.7296	22.2086	3.65145	0.1019	0.0419	0.0193	0.0024	0.0019	0.0789	0.0317
57.616	21.973	3.61885	0.1051	0.0411	0.0177	0.0018	0.0015	0.0869	0.0316
58.5024	22.0588	3.55707	0.1086	0.0446	0.0182	0.0018	0.0022	0.0792	0.0317
59.3888	21.7991	3.63037	0.1161	0.042	0.0155	0.0012	0.0014	0.0843	0.0284
60.2752	21.7272	3.57609	0.1175	0.0413	0.014	0.0018	0.0018	0.0832	0.0305
61.1616	21.7374	3.52464	0.1219	0.0384	0.0145	0.0016	0.0019	0.0778	0.0292
62.048	21.2917	3.51037	0.1169	0.0382	0.0173	0.0025	0.0018	0.0785	0.0326
62.9344	21.2862	3.54889	0.1167	0.0364	0.014	0.0013	0.0012	0.0732	0.0237
63.8208	21.296	3.48808	0.1228	0.037	0.0153	0.0022	0.0008	0.0712	0.0296
64.7072	21.1503	3.5015	0.1199	0.0344	0.0122	0.0017	0.0019	0.0752	0.0269
65.5936	20.5345	3.40504	0.1235	0.0309	0.0109	0.0012	0.0013	0.0717	0.029
66.48	20.9459	3.43786	0.1196	0.0332	0.0112	0.0015	0.0013	0.0755	0.0296
67.3664	20.6573	3.34544	0.1251	0.0312	0.0117	0.0014	0.0013	0.0716	0.0242
68.2528	20.7697	3.33969	0.1362	0.0303	0.0116	0.0019	0.0015	0.0758	0.0226
69.1392	20.1981	3.31426	0.1253	0.0299	0.0108	0.0007	0.0015	0.0715	0.0251
70.0256	20.5237	3.2651	0.1377	0.0272	0.0105	0.0015	0.0015	0.0698	0.0192
70.912	20.2477	3.30239	0.1321	0.0279	0.0095	0.0008	0.0006	0.0724	0.0222
71.7984	20.2061	3.2661	0.1306	0.025	0.0103	0.0014	0.0009	0.0681	0.0204
72.6848	20.1001	3.21763	0.1237	0.0259	0.0096	0.0012	0.0005	0.0634	0.0221
73.5712	19.8678	3.25002	0.1313	0.0245	0.0076	0.001	0.0015	0.0662	0.0219
74.4576	19.5204	3.22578	0.136	0.0214	0.0082	0.0008	0.0011	0.065	0.0223
75.344	19.56	3.20622	0.1265	0.0226	0.0079	0.0012	0.0006	0.0641	0.0204
76.2304	19.7423	3.13905	0.1301	0.021	0.0078	0.0009	0.0014	0.0617	0.0205
77.1168	19.6224	3.14671	0.1303	0.0204	0.0066	0.0009	0.0014	0.0589	0.0212
78.0032	19.4981	3.16144	0.131	0.0207	0.0079	0.0014	0.0006	0.0654	0.0167
78.8896	19.2533	3.08926	0.1368	0.0212	0.0073	0.0012	0.0007	0.0606	0.0156
79.776	19.2747	3.09912	0.1328	0.0201	0.0058	0.0008	0.0006	0.061	0.0154
80.6624	19.1416	3.08728	0.1318	0.0182	0.0055	0.0008	0.0006	0.0607	0.0168
81.5488	19.0455	3.11647	0.1307	0.0159	0.0053	0.0006	0.0006	0.0551	0.0185
82.4352	18.9003	3.08948	0.1293	0.0167	0.0053	0.001	0.0006	0.0594	0.0166
83.3216	18.8461	3.06036	0.1249	0.0161	0.0044	0.0009	0.0004	0.0629	0.016
84.208	18.7064	3.04107	0.1345	0.0149	0.0044	0.0001	0.0011	0.058	0.0171
85.0944	18.6597	3.04501	0.1266	0.016	0.0052	0.0002	0.0005	0.0523	0.015
85.9808	18.5917	2.98294	0.1315	0.0135	0.0035	0.0005	0.0009	0.0569	0.0134
86.8672	18.3934	3.02067	0.1327	0.0135	0.0037	0.0008	0.0004	0.0536	0.0141
87.7536	18.4076	2.98977	0.1172	0.0157	0.0034	0.0002	0.0007	0.0561	0.0159
88.64	18.2723	2.99001	0.121	0.0143	0.0032	0.0002	0.0003	0.0536	0.0149
89.5264	18.1028	3.01248	0.1257	0.0135	0.0022	0.0003	0.0006	0.0534	0.0167
90.4128	17.9979	2.92767	0.1135	0.0128	0.0025	0.0003	0.0007	0.0563	0.0139
91.2992	18.1449	2.94656	0.119	0.0135	0.0033	0.0005	0.0005	0.0525	0.0145
92.1856	18.046	2.95099	0.1128	0.0111	0.003	0.0002	0.0003	0.0536	0.0157
93.072	17.8889	2.90048	0.1088	0.0101	0.0019	0.0006	0.0004	0.0475	0.0139
93.9584	17.7089	2.9209	0.1113	0.0125	0.0025	0.0003	0	0.0519	0.0134
94.8448	17.8802	2.8863	0.1165	0.0116	0.0024	0.0002	0.0004	0.0526	0.0132
95.7312	17.7335	2.90052	0.1093	0.011	0.0026	0.0002	0.0003	0.052	0.0154
96.6176	17.5918	2.85196	0.1031	0.011	0.0029	0.0003	0.0002	0.0497	0.0178
97.504	17.5138	2.86943	0.104	0.0105	0.0014	0.0002	0.0002	0.0504	0.012
98.3904	17.4735	2.84792	0.1056	0.0096	0.0015	0.0003	0.0004	0.0449	0.0138
99.2768	17.4385	2.81553	0.0984	0.0097	0.0019	0.0002	0.0003	0.0455	0.0112
100.163	17.4814	2.86354	0.1047	0.0098	0.0024	0.0003	0	0.0543	0.0107
101.05	17.3747	2.76297	0.0992	0.0088	0.0027	0.0002	0.0003	0.0484	0.0123
101.936	17.2452	2.75641	0.0981	0.0094	0.0016	0.0002	0.0003	0.0482	0.01
102.822	17.3277	2.72056	0.0996	0.0084	0.0012	0	0.0001	0.0452	0.0128
103.709	17.2264	2.76064	0.096	0.009	0.0009	0.0002	0.0001	0.047	0.0128
104.595	17.0924	2.79808	0.0889	0.0085	0.0014	0.0001	0.0003	0.0444	0.0105
105.482	16.636	2.73879	0.0863	0.0082	0.0011	0.0003	0.0004	0.0465	0.0114
106.368	16.9459	2.76864	0.0887	0.0082	0.001	0.0001	0.0001	0.0438	0.0111
107.254	16.9657	2.75418	0.0814	0.0064	0.0009	0	0.0001	0.0448	0.0092
108.141	16.9433	2.74174	0.0829	0.0088	0.0013	0	0.0002	0.0501	0.0141
109.027	16.7053	2.71384	0.084	0.0098	0.0005	0.0002	0	0.0454	0.0095
109.914	16.7801	2.67549	0.0829	0.0059	0.0009	0	0.0001	0.043	0.0091
110.8	16.255	2.63513	0.0765	0.0068	0.0007	0	0.0003	0.046	0.0108
111.686	16.5539	2.71758	0.0769	0.0085	0.0009	0.0002	0.0001	0.0449	0.0108
112.573	16.6866	2.69064	0.0755	0.0072	0.0008	0	0.0002	0.0451	0.0112
113.459	16.6926	2.68271	0.0729	0.0083	0.0009	0	0.0001	0.0451	0.0097
114.346	16.6492	2.67902	0.0733	0.0076	0.0014	0.0001	0	0.0454	0.0109
115.232	16.2814	2.6607	0.0699	0.0057	0.001	0.0001	0.0003	0.0435	0.0104
116.118	16.4935	2.6325	0.0707	0.0061	0.0007	0.0003	0.0001	0.0425	0.0092
117.005	16.0987	2.61887	0.0727	0.0085	0.0008	0	0	0.0423	0.0074
117.891	16.409	2.59852	0.0715	0.0061	0.0009	0.0001	0	0.0435	0.0085
118.778	15.901	2.55788	0.0647	0.0074	0.0003	0	0.0001	0.0399	0.009
119.664	16.3473	2.64007	0.0624	0.007	0.0002	0.0001	0.0003	0.0427	0.0102
120.55	16.4165	2.59981	0.0613	0.0063	0.0004	0.0001	0	0.044	0.0085
121.437	16.2731	2.5806	0.0586	0.0069	0.0009	0	0	0.0461	0.0076
122.323	16.2712	2.59574	0.0636	0.006	0.0009	0.0001	0	0.0446	0.0094
123.21	16.2328	2.58146	0.0595	0.0057	0.0006	0	0	0.0443	0.0094
124.096	16.2459	2.59999	0.0583	0.0067	0.0005	0	0.0001	0.0426	0.006
124.982	16.1646	2.57269	0.0558	0.0077	0.0004	0	0.0001	0.0441	0.0095
125.869	16.2023	2.58935	0.0548	0.0058	0.0005	0	0	0.0366	0.008
126.755	16.1642	2.59639	0.0489	0.0064	0.0005	0.0001	0.0001	0.0443	0.0089
127.642	15.9698	2.55578	0.0489	0.0051	0.0002	0.0002	0	0.0414	0.0088
128.528	16.0247	2.5652	0.0493	0.006	0.0004	0.0001	0	0.0419	0.0095
129.414	16.0405	2.55177	0.0484	0.006	0.0005	0	0	0.0416	0.0067
130.301	15.8222	2.58047	0.045	0.0067	0.0004	0	0	0.0413	0.01
131.187	15.9184	2.68267	0.044	0.0068	0.0001	0.0001	0	0.0472	0.0111
132.074	15.9701	2.58417	0.041	0.0064	0.0004	0	0.0001	0.0433	0.0109
132.96	15.9361	2.57116	0.0436	0.0065	0.0002	0	0.0001	0.0369	0.0103
133.846	15.9258	2.57412	0.0406	0.0044	0.0004	0.0001	0	0.0403	0.0091
134.733	15.9282	2.54813	0.0395	0.0057	0.0006	0.0001	0	0.0418	0.0111
135.619	15.8978	2.48553	0.0403	0.0059	0	0	0	0.0434	0.0098
136.506	15.6669	2.48114	0.0348	0.0057	0.0002	0	0	0.0432	0.008
137.392	15.6295	2.48768	0.0385	0.0056	0.0003	0	0.0001	0.0374	0.0084
138.278	15.639	2.46349	0.0372	0.0052	0.0003	0.0001	0	0.0422	0.01
139.165	15.6793	2.56062	0.0364	0.0047	0.0001	0	0	0.0433	0.0082
140.051	16.0056	2.56198	0.0334	0.0055	0.0001	0	0	0.0402	0.0108
140.938	15.5144	2.50706	0.0309	0.0056	0.0002	0.0001	0	0.0408	0.0106
141.824	15.8216	2.497	0.0312	0.0063	0.0004	0.0001	0	0.0431	0.009
142.71	15.84	2.53227	0.0333	0.0065	0.0001	0	0	0.0372	0.0102
143.597	15.7099	2.49844	0.0296	0.0058	0.0001	0	0	0.0397	0.0075
144.483	15.7221	2.49867	0.0311	0.0055	0.0002	0.0002	0	0.0423	0.0062
145.37	15.562	2.45925	0.0276	0.0067	0.0001	0	0	0.0415	0.0079
146.256	15.7526	2.48548	0.0281	0.0059	0.0002	0	0	0.0398	0.0058
147.142	15.5641	2.47791	0.0271	0.0064	0	0	0	0.038	0.0078
148.029	15.6225	2.47112	0.0272	0.0069	0.0001	0	0	0.0388	0.0068
148.915	15.5126	2.42115	0.0238	0.0062	0.0003	0	0	0.0427	0.0067
149.802	15.3602	2.44824	0.0232	0.0057	0.0003	0	0	0.0412	0.0063
150.688	15.4015	2.47625	0.0228	0.006	0.0002	0	0	0.0383	0.006
151.574	15.5768	2.59343	0.022	0.0059	0.0001	0	0.0001	0.0432	0.0093
152.461	15.7609	2.53866	0.0212	0.0071	0.0004	0	0.0001	0.0408	0.0099
153.347	15.7873	2.59956	0.0214	0.005	0.0002	0	0	0.0427	0.0109
154.234	15.9157	2.5926	0.0186	0.0052	0.0001	0	0	0.0413	0.0114
155.12	15.7074	2.46939	0.0182	0.0048	0.0001	0	0	0.0415	0.0109
156.006	15.7285	2.5005	0.0169	0.0048	0	0.0001	0.0001	0.0411	0.0109
156.893	15.6396	2.48004	0.018	0.005	0.0002	0	0	0.0445	0.0115
157.779	15.3217	2.4088	0.0167	0.0053	0.0001	0	0.0001	0.0371	0.0092
158.666	15.5081	2.51733	0.0166	0.0047	0.0001	0	0	0.0411	0.0107
159.552	15.4595	2.44832	0.0167	0.0049	0.0004	0.0001	0.0001	0.0402	0.0077
160.438	15.4113	2.44467	0.0146	0.0069	0.0003	0	0	0.0394	0.0074
161.325	15.0385	2.44308	0.0142	0.0043	0	0	0	0.0376	0.0094
162.211	15.3985	2.51052	0.0151	0.005	0	0	0	0.0383	0.0085
163.098	15.6207	2.54012	0.0137	0.0055	0.0001	0	0	0.0406	0.0102
163.984	15.6285	2.56023	0.0098	0.0053	0	0.0002	0	0.0423	0.0138
164.87	15.4855	2.5581	0.0096	0.0052	0	0	0	0.0409	0.0115
165.757	15.5952	2.46357	0.0104	0.0042	0.0001	0	0	0.0431	0.0135
166.643	15.4915	2.50449	0.01	0.0046	0	0	0	0.0436	0.0105
167.53	15.1529	2.43989	0.0107	0.0061	0.0001	0	0	0.042	0.0093
168.416	14.9461	2.44696	0.0111	0.0053	0.0002	0.0001	0	0.0368	0.0105
169.302	15.2158	2.46181	0.0096	0.0054	0.0001	0	0	0.0393	0.0088
170.189	15.2552	2.47551	0.0101	0.0049	0	0	0	0.0411	0.0093
171.075	15.182	2.4518	0.0102	0.005	0.0001	0.0001	0	0.0398	0.0066
171.962	15.2143	2.44528	0.0084	0.0056	0	0	0	0.0406	0.0074
172.848	14.851	2.37569	0.008	0.0058	0.0001	0	0	0.0398	0.0081
173.734	15.0467	2.40804	0.0087	0.005	0	0	0	0.0384	0.0076
174.621	14.64	2.35429	0.0067	0.0061	0	0	0	0.0378	0.0094
175.507	15.023	2.47883	0.0062	0.0047	0.0003	0.0001	0	0.0426	0.0073
176.394	15.2451	2.52075	0.0074	0.0048	0	0	0	0.0367	0.0099
177.28	15.2493	2.50725	0.0067	0.0048	0	0	0	0.039	0.0123
178.166	15.343	2.51889	0.0062	0.0045	0	0	0	0.0398	0.0122
179.053	15.3296	2.48752	0.0043	0.0036	0.0001	0	0	0.0364	0.0127
179.939	15.2614	2.44059	0.0049	0.0041	0	0	0	0.0418	0.0103
180.826	15.2031	2.4593	0.0053	0.006	0.0001	0	0	0.0386	0.009
181.712	15.0059	2.37202	0.0045	0.0046	0	0	0	0.0426	0.009
182.598	15.1632	2.44289	0.0059	0.0048	0	0	0	0.0365	0.0079
183.485	14.9875	2.42934	0.0039	0.0057	0.0001	0	0.0001	0.0373	0.0096
184.371	15.1823	2.44631	0.0033	0.0048	0.0001	0	0	0.0422	0.01
185.258	15.2206	2.50947	0.0045	0.0043	0.0001	0	0	0.037	0.0091
186.144	15.2564	2.46416	0.0039	0.0047	0.0001	0	0	0.0414	0.0115
187.03	15.2638	2.50118	0.0029	0.0052	0.0002	0	0	0.0389	0.0094
187.917	15.1676	2.45145	0.004	0.0046	0	0	0	0.0394	0.0124
188.803	15.1711	2.44279	0.0033	0.004	0	0	0	0.0413	0.0108
189.69	15.144	2.4489	0.0035	0.0043	0	0	0	0.0413	0.0104
190.576	15.2687	2.42476	0.003	0.0047	0	0	0.0002	0.039	0.0075
191.462	14.8979	2.3716	0.0024	0.006	0	0	0	0.0404	0.0087
192.349	15.0153	2.42719	0.0032	0.0057	0	0.0001	0	0.0394	0.0081
193.235	15.0839	2.42043	0.0031	0.0048	0	0	0	0.0408	0.0076
194.122	14.9057	2.39026	0.0026	0.0037	0	0	0	0.0383	0.0085
195.008	14.7276	2.40459	0.0025	0.0059	0	0	0	0.0426	0.0098
195.894	15.1049	2.44585	0.0023	0.0044	0.0001	0.0001	0	0.0417	0.0101
196.781	14.988	2.45791	0.0022	0.0053	0.0001	0	0	0.0368	0.009
197.667	15.1401	2.48422	0.0021	0.005	0	0	0	0.0398	0.0106
198.554	15.3555	2.45166	0.0021	0.0045	0	0	0	0.0411	0.0115
199.44	15.2121	2.44367	0.002	0.004	0.0001	0	0	0.04	0.012
200.326	15.3194	2.4315	0.0026	0.004	0	0	0	0.0383	0.0106
201.213	15.1684	2.44963	0.0017	0.0053	0.0002	0.0001	0	0.0391	0.0094
202.099	14.5479	2.33417	0.0015	0.0043	0	0	0	0.0372	0.0102
202.986	14.4391	2.3388	0.0007	0.0065	0.0001	0	0	0.0366	0.0098
203.872	14.7611	2.40309	0.002	0.005	0	0	0	0.0362	0.0105
204.758	14.7526	2.40669	0.0012	0.0056	0	0	0	0.0403	0.0089
205.645	14.8346	2.4136	0.0014	0.0055	0.0001	0	0	0.0382	0.0078
206.531	15.0366	2.45726	0.0016	0.0054	0.0002	0	0	0.0401	0.0095
207.418	15.1708	2.40793	0.0016	0.0045	0.0002	0.0001	0	0.0392	0.0086
208.304	15.1508	2.45237	0.0016	0.0056	0.0001	0	0	0.0373	0.0114
209.19	15.2974	2.45525	0.001	0.0054	0	0	0	0.0402	0.0119
210.077	15.2049	2.47664	0.0008	0.0055	0	0	0	0.038	0.0094
210.963	15.2771	2.39918	0.0012	0.0041	0	0	0	0.0397	0.0103
211.85	15.0228	2.43127	0.0011	0.0042	0	0	0	0.0415	0.0083
212.736	14.9577	2.39792	0.001	0.0043	0	0	0	0.0421	0.0103
213.622	14.9912	2.39721	0.001	0.0036	0.0001	0.0001	0	0.0387	0.0088
214.509	14.7819	2.40313	0.0008	0.005	0	0	0	0.0394	0.0102
215.395	14.2416	2.28795	0.0006	0.0051	0	0	0	0.0361	0.0089
216.282	14.9172	2.3577	0.0013	0.0044	0.0001	0	0	0.0346	0.0072
217.168	14.9186	2.35527	0.0002	0.0051	0.0001	0	0	0.0391	0.0107
218.054	14.9115	2.40434	0.0009	0.0044	0.0001	0.0001	0	0.0405	0.0093
218.941	14.9932	2.48668	0.0011	0.0043	0	0	0	0.0385	0.0108
219.827	14.3403	2.34878	0.0014	0.005	0.0001	0	0	0.0384	0.0123
220.714	14.9456	2.4413	0.0008	0.004	0	0	0	0.0394	0.0114
221.6	14.7048	2.3547	0.0002	0.0049	0.0002	0	0	0.0403	0.0122
222.486	14.938	2.38024	0.0005	0.0051	0	0	0	0.0382	0.0112
223.373	14.8964	2.37795	0.0008	0.0046	0	0	0	0.0396	0.0095
224.259	14.8985	2.35272	0.0008	0.0048	0	0	0	0.0352	0.0094
225.146	14.8961	2.35224	0.0006	0.0046	0.0002	0	0	0.0395	0.008
226.032	14.666	2.32711	0.0006	0.0052	0	0	0	0.0372	0.0076
226.918	14.7438	2.34265	0.0008	0.0071	0	0	0	0.0369	0.0067
227.805	13.9332	2.20217	0.0004	0.0105	0	0.0001	0	0.04	0.0081
228.691	14.7065	2.31278	0.0005	0.0051	0	0	0	0.0421	0.0065
229.578	14.6227	2.29976	0.0008	0.0048	0	0	0	0.0376	0.0073
230.464	14.6758	2.3144	0.0006	0.0055	0	0.0001	0	0.0384	0.0056
231.35	14.6486	2.4197	0.0004	0.0058	0.0002	0	0	0.0382	0.0081
232.237	14.6174	2.43762	0.0005	0.0053	0.0001	0	0	0.039	0.0089
233.123	14.9953	2.40921	0.0003	0.005	0	0	0	0.0393	0.0093
234.01	14.9758	2.48926	0.0005	0.0042	0	0.0001	0	0.0411	0.0121
234.896	14.4079	2.2591	0	0.0049	0.0001	0	0	0.0373	0.0133
235.782	14.9146	2.34903	0.0005	0.0035	0	0	0	0.0378	0.0099
236.669	14.7519	2.34215	0.001	0.0059	0.0001	0	0	0.0337	0.0104
237.555	14.8264	2.34869	0.0007	0.0049	0.0002	0	0	0.0382	0.0083
238.442	14.6276	2.31695	0.0009	0.0047	0.0001	0	0	0.0385	0.0076
239.328	14.7436	2.36967	0.0005	0.0039	0.0001	0	0	0.0403	0.0068
240.214	14.2996	2.26575	0.0004	0.0085	0.0001	0	0	0.0362	0.0079
241.101	14.6678	2.27077	0.0005	0.005	0.0001	0	0	0.0382	0.0089
241.987	14.6164	2.33852	0.0002	0.0054	0	0	0	0.0393	0.0092
242.874	14.6814	2.3362	0.0003	0.0056	0.0001	0	0	0.0398	0.0081
243.76	14.6074	2.34627	0.0004	0.005	0.0001	0.0001	0	0.0395	0.0093
244.646	14.7913	2.41384	0.0001	0.0046	0	0	0	0.0398	0.0107
245.533	14.7025	2.3901	0.0004	0.0047	0	0	0	0.0419	0.0095
246.419	14.7304	2.36602	0.0005	0.006	0	0	0	0.0404	0.0101
247.306	14.7158	2.28716	0.0006	0.0051	0	0	0	0.0424	0.0108
248.192	14.7629	2.36844	0.0007	0.005	0	0	0	0.0426	0.01
249.078	14.7013	2.32163	0.0003	0.005	0	0	0	0.0386	0.0096
249.965	13.7589	2.19384	0	0.0094	0.0001	0	0	0.0358	0.0092
250.851	14.8626	2.3036	0.0004	0.005	0.0001	0	0	0.0349	0.0079
251.738	14.6861	2.29421	0.0003	0.0051	0	0.0001	0	0.0346	0.0058
252.624	14.6192	2.34176	0.0003	0.0044	0	0	0	0.0396	0.0071
253.51	14.6896	2.32032	0.0002	0.0049	0	0	0	0.0381	0.0085
254.397	14.7329	2.36563	0.0002	0.0054	0.0001	0	0	0.0422	0.0085
255.283	14.836	2.3948	0.0001	0.0042	0.0001	0	0	0.0397	0.0085
256.17	14.7484	2.41482	0.0001	0.0038	0	0	0	0.0385	0.0103
257.056	14.9559	2.37484	0.0004	0.0045	0	0	0	0.0367	0.0094
257.942	14.9532	2.34557	0.0003	0.0052	0.0001	0	0	0.0399	0.0098
258.829	14.8887	2.29384	0.0002	0.0054	0.0001	0	0	0.0364	0.0106
259.715	14.6947	2.33228	0.0005	0.006	0	0	0	0.0367	0.0125
260.602	14.5609	2.28424	0.0004	0.0042	0	0	0	0.0357	0.0092
261.488	14.559	2.2435	0.0004	0.0059	0	0	0	0.0385	0.0086
262.374	14.3542	2.25283	0.0001	0.0055	0	0	0	0.0388	0.0075
263.261	14.6259	2.25955	0	0.0065	0.0001	0	0	0.0401	0.0074
264.147	14.6701	2.32691	0.0004	0.0053	0	0	0	0.0367	0.0067
265.034	14.2107	2.27296	0.0002	0.0046	0	0	0	0.0385	0.0091
265.92	14.6759	2.37793	0.0003	0.0043	0.0001	0.0002	0	0.0377	0.0082
266.806	14.5776	2.39969	0.0002	0.0041	0.0002	0.0001	0	0.0362	0.0104
267.693	14.7184	2.39624	0.0002	0.0036	0	0	0	0.0335	0.0106
268.579	14.7269	2.34684	0.0007	0.0051	0	0	0	0.0387	0.01
269.466	14.7447	2.3317	0.0003	0.0037	0	0	0	0.0386	0.0093
270.352	14.8152	2.34679	0.0002	0.0046	0.0001	0	0	0.0363	0.0105
271.238	14.6753	2.29352	0.0001	0.005	0	0	0	0.0372	0.0093
272.125	14.6101	2.28139	0.0002	0.0047	0	0	0	0.0388	0.0112
273.011	14.5507	2.25793	0.0007	0.0061	0.0001	0.0001	0	0.0425	0.0073
273.898	14.4286	2.26963	0.0004	0.0059	0	0	0	0.0369	0.0074
274.784	14.3576	2.23319	0.0004	0.0065	0	0	0	0.0395	0.0063
275.67	14.5242	2.23626	0.0003	0.005	0.0002	0	0	0.0336	0.0075
276.557	14.3001	2.30777	0	0.0056	0	0	0	0.038	0.0077
277.443	14.5277	2.35339	0.0002	0.0048	0	0	0	0.0376	0.008
278.33	14.6222	2.38348	0.0003	0.0041	0	0	0	0.0353	0.0107
279.216	14.4508	2.32428	0	0.0048	0.0001	0	0	0.0388	0.011
280.102	14.7563	2.31446	0	0.0052	0.0001	0	0	0.0413	0.0111
280.989	14.5436	2.32278	0.0002	0.0041	0	0	0	0.0397	0.0088
281.875	14.5556	2.26087	0.0002	0.0044	0	0	0	0.0366	0.0098
282.762	14.522	2.26593	0.0003	0.0042	0	0	0	0.0355	0.0097
283.648	14.4933	2.21852	0.0001	0.0038	0	0.0002	0.0001	0.0356	0.0082
284.534	14.4794	2.27349	0.0003	0.0047	0.0001	0	0	0.0382	0.0074
285.421	14.4493	2.25335	0.0001	0.0059	0	0.0001	0	0.0367	0.0058
286.307	14.4556	2.25094	0.0002	0.0047	0	0	0	0.0355	0.0063
287.194	14.0995	2.24744	0.0001	0.0055	0.0001	0	0	0.0361	0.0085
288.08	14.5776	2.30168	0.0002	0.0054	0	0	0	0.0382	0.0081
288.966	14.5499	2.33532	0.0002	0.0043	0	0	0	0.0398	0.0111
289.853	14.3451	2.28354	0.0001	0.0052	0	0	0	0.0365	0.0096
290.739	14.594	2.32381	0.0001	0.0042	0	0	0	0.0412	0.0104
291.626	14.432	2.2769	0.0001	0.0042	0	0	0	0.0395	0.0108
292.512	14.4063	2.23005	0	0.0042	0	0.0001	0	0.0375	0.0102
293.398	14.4297	2.24059	0.0001	0.0044	0	0	0	0.0367	0.0085
294.285	13.7458	2.15132	0.0003	0.0055	0.0001	0	0	0.0373	0.0095
295.171	13.7321	2.16645	0.0001	0.0092	0.0003	0	0	0.0362	0.0083
296.058	14.25	2.25801	0.0001	0.0044	0	0.0001	0	0.0392	0.0085
296.944	14.2999	2.31092	0.0001	0.003	0	0	0	0.0382	0.0075
297.83	14.4209	2.36312	0.0002	0.0064	0	0	0	0.0355	0.0095
298.717	14.469	2.34594	0	0.0037	0	0	0	0.0432	0.0093
299.603	14.5932	2.29494	0.0003	0.0042	0	0	0	0.0374	0.0108
300.49	14.3007	2.25263	0.0003	0.0047	0	0	0	0.0352	0.0104
301.376	14.3626	2.28415	0.0004	0.0048	0.0001	0	0	0.0394	0.0103
302.262	14.4309	2.25558	0.0004	0.003	0	0	0	0.04	0.0088
303.149	14.1184	2.25427	0.0001	0.0052	0	0	0	0.0381	0.0089
304.035	14.1543	2.22024	0.0004	0.0043	0	0	0	0.0324	0.0072
304.922	14.1889	2.2021	0.0002	0.0037	0	0	0	0.034	0.0069
305.808	13.9506	2.19175	0.0001	0.0062	0	0.0001	0	0.035	0.0084
306.694	14.0628	2.24132	0	0.0049	0	0.0001	0	0.0356	0.0053
307.581	13.9358	2.21781	0.0002	0.0049	0	0	0	0.0368	0.0065
308.467	14.1975	2.30011	0.0003	0.0048	0.0001	0	0	0.0382	0.0079
309.354	14.1979	2.31119	0.0002	0.0041	0	0	0	0.0385	0.0096
310.24	14.4034	2.33111	0.0002	0.0045	0	0	0.0002	0.0398	0.0087
311.126	14.2639	2.31082	0.0001	0.0052	0	0	0	0.0395	0.0096
312.013	14.433	2.2451	0.0002	0.0045	0	0	0.0001	0.0384	0.0082
312.899	14.1968	2.23096	0.0003	0.0044	0	0	0	0.0405	0.0088
313.786	14.2717	2.21316	0.0002	0.0044	0	0	0	0.0362	0.0101
314.672	14.1823	2.22755	0.0002	0.0053	0	0	0	0.0342	0.0078
315.558	14.0636	2.17877	0	0.0049	0.0002	0.0001	0	0.0374	0.0086
316.445	14.2259	2.21518	0.0002	0.0042	0	0	0	0.0377	0.0098
317.331	14.1629	2.23812	0.0002	0.0054	0	0	0	0.0376	0.0061
318.218	14.28	2.25871	0.0001	0.0059	0	0	0	0.0361	0.0088
319.104	13.9132	2.22176	0	0.0059	0	0	0	0.0358	0.01
319.99	14.01	2.23186	0.0001	0.0046	0	0	0	0.0388	0.0106
320.877	14.2436	2.26393	0.0002	0.0041	0.0001	0	0	0.0367	0.009
321.763	14.3618	2.23177	0	0.0039	0	0	0	0.0361	0.0111
322.65	14.1605	2.2066	0.0001	0.0037	0	0	0	0.0404	0.0102
323.536	14.0337	2.18937	0.0001	0.0045	0	0	0	0.0325	0.0094
324.422	14.0106	2.19239	0.0001	0.0042	0.0001	0	0	0.038	0.0081
325.309	13.7133	2.15481	0.0002	0.0053	0	0	0	0.0333	0.0084
326.195	13.8873	2.13631	0.0002	0.0064	0	0	0	0.0334	0.009
327.082	14.121	2.1836	0.0001	0.0047	0.0001	0	0	0.0368	0.0078
327.968	14.0415	2.1938	0.0001	0.0063	0	0	0	0.0369	0.0064
328.854	14.0154	2.21058	0.0002	0.0043	0	0	0	0.0362	0.0064
329.741	13.986	2.21576	0.0001	0.0034	0	0	0	0.0393	0.0083
330.627	14.2207	2.2731	0.0002	0.0049	0	0	0	0.036	0.011
331.514	14.2607	2.27375	0.0001	0.004	0	0	0	0.0322	0.0083
332.4	14.339	2.25998	0.0001	0.0042	0	0	0	0.04	0.0106
333.286	14.3165	2.23167	0.0001	0.0041	0	0	0	0.0328	0.0095
334.173	14.0414	2.20636	0	0.0045	0	0	0	0.0325	0.0094
335.059	14.0939	2.18151	0.0003	0.0053	0.0001	0	0	0.0375	0.0088
335.946	14.0654	2.22094	0.0002	0.0046	0.0001	0	0	0.0368	0.0089
336.832	13.957	2.20185	0.0004	0.0044	0	0	0	0.0361	0.0068
337.718	13.9076	2.18065	0.0001	0.0037	0	0	0	0.0358	0.007
338.605	13.9675	2.17615	0.0001	0.0036	0	0	0	0.0367	0.0063
339.491	13.9137	2.14357	0.0002	0.0053	0	0	0	0.0333	0.0077
340.378	13.9637	2.19772	0.0002	0.005	0	0	0	0.0349	0.0086
341.264	13.9235	2.27006	0.0001	0.0058	0	0	0	0.036	0.0087
342.15	14.1472	2.25619	0	0.0061	0	0	0	0.0364	0.0102
343.037	13.8822	2.1992	0	0.005	0	0	0	0.0367	0.01
343.923	14.4144	2.21361	0.0001	0.0033	0	0	0	0.0408	0.01
344.81	14.0766	2.23896	0.0002	0.0049	0	0	0	0.0376	0.0085
345.696	14.1014	2.18629	0.0001	0.0046	0	0	0	0.0378	0.0083
346.582	14.0914	2.16252	0.0001	0.0053	0.0001	0	0	0.036	0.006
347.469	13.9122	2.16333	0.0001	0.004	0	0	0	0.0371	0.0086
348.355	14.0381	2.12406	0.0004	0.0042	0	0	0	0.0366	0.0057
349.242	13.8364	2.12863	0.0002	0.0057	0	0	0	0.0349	0.0046
350.128	13.8978	2.1085	0.0004	0.0044	0	0	0.0001	0.0341	0.0053
351.014	13.898	2.12786	0.0003	0.0034	0	0.0001	0	0.0379	0.0061
351.901	13.849	2.13292	0.0003	0.0037	0	0	0	0.0354	0.0053
352.787	13.5895	2.1442	0.0001	0.0034	0	0	0	0.0355	0.0072
353.674	13.8274	2.21194	0	0.0045	0	0	0	0.0379	0.0098
354.56	14.1935	2.27123	0.0001	0.0049	0	0	0	0.0373	0.01
355.446	13.9982	2.25744	0.0003	0.0047	0	0	0	0.0358	0.0103
356.333	13.5457	2.1704	0.0001	0.005	0.0001	0.0002	0	0.0375	0.0111
357.219	13.8062	2.16633	0	0.0039	0.0002	0	0	0.037	0.0086
358.106	14.1025	2.13414	0.0002	0.0036	0.0001	0	0	0.0395	0.0103
358.992	13.7964	2.14863	0.0001	0.0045	0	0	0	0.0387	0.0096
359.878	13.7307	2.18099	0.0002	0.0048	0	0	0	0.037	0.0084
360.765	13.7443	2.12181	0.0004	0.0039	0.0001	0	0	0.0364	0.0089
361.651	13.7685	2.11123	0.0003	0.004	0.0004	0.0001	0	0.036	0.007
362.538	13.7229	2.09919	0.0003	0.0055	0.0001	0	0	0.0387	0.0063
363.424	13.439	2.09111	0.0002	0.0071	0	0	0	0.0362	0.0094
364.31	13.5852	2.08913	0.0002	0.0053	0	0	0	0.0324	0.0071
365.197	13.5756	2.13305	0.0001	0.0046	0	0	0	0.0371	0.0059
366.083	13.6063	2.14715	0.0001	0.0049	0	0	0	0.0346	0.0088
366.97	13.5745	2.15594	0.0003	0.0034	0	0	0	0.0345	0.0107
367.856	14.2183	2.20993	0.0003	0.0036	0	0	0	0.0369	0.0115
368.742	14.102	2.18825	0	0.0047	0	0	0	0.039	0.0089
369.629	14.0293	2.17141	0.0001	0.0042	0	0	0	0.0375	0.0109
370.515	14.0075	2.16665	0	0.0042	0.0001	0	0	0.0333	0.0105
371.402	14.0882	2.10498	0	0.0037	0.0002	0	0.0001	0.0354	0.0091
372.288	13.8989	2.14068	0.0002	0.0045	0	0	0	0.0325	0.0086
373.174	12.9625	2.00068	0.0001	0.0046	0.0002	0	0	0.0318	0.0082
374.061	13.5978	2.04834	0.0001	0.0087	0	0	0	0.0371	0.0091
374.947	13.7374	2.10687	0.0002	0.0048	0	0	0	0.036	0.0066
375.834	13.9914	2.13803	0.0001	0.0058	0	0	0	0.0368	0.0066
376.72	13.6292	2.12394	0.0003	0.0039	0	0	0	0.0366	0.0082
377.606	13.8615	2.17477	0.0001	0.0045	0.0001	0	0	0.039	0.008
378.493	13.9524	2.23851	0.0003	0.0032	0	0.0001	0	0.0376	0.0091
379.379	14.0033	2.1824	0	0.0044	0	0.0001	0	0.033	0.0086
380.266	13.8107	2.17681	0	0.0051	0.0001	0	0	0.035	0.0104
381.152	13.7311	2.14072	0.0001	0.0053	0	0	0	0.0365	0.0095
382.038	14.0118	2.15959	0.0002	0.0043	0	0	0	0.0338	0.0097
382.925	13.7724	2.12064	0.0002	0.0046	0.0001	0	0	0.0357	0.0095
383.811	13.8828	2.12545	0	0.0041	0	0	0	0.0371	0.0078
384.698	13.8274	2.12918	0.0002	0.0055	0.0001	0	0.0001	0.0395	0.0086
385.584	13.1836	2.0211	0.0002	0.0057	0.0001	0	0	0.0328	0.0098
386.47	13.7972	2.13106	0.0001	0.0047	0	0	0	0.0358	0.0077
387.357	13.6671	2.13019	0	0.0061	0	0	0	0.0382	0.0085
388.243	13.573	2.17258	0.0001	0.0033	0	0	0	0.0378	0.0094
389.13	13.4273	2.12411	0.0002	0.0075	0	0	0	0.0361	0.0097
390.016	14.0536	2.16572	0	0.0047	0.0001	0	0	0.0349	0.0077
390.902	13.8315	2.15234	0.0002	0.004	0	0	0	0.035	0.0095
391.789	13.7406	2.15962	0	0.0034	0	0	0	0.0376	0.008
392.675	13.7541	2.12062	0.0002	0.0047	0.0001	0	0	0.036	0.0083
393.562	13.715	2.08981	0	0.0042	0	0	0	0.0333	0.0101
394.448	13.7382	2.08707	0.0002	0.0046	0	0	0	0.036	0.0084
395.334	13.5809	2.07308	0.0002	0.004	0.0001	0.0001	0	0.0368	0.0069
396.221	13.6234	2.06186	0.0001	0.0034	0	0	0	0.0357	0.0081
397.107	13.4828	2.06168	0.0003	0.0035	0	0	0	0.0364	0.0064
397.994	13.6268	2.08878	0	0.0053	0.0001	0	0	0.0356	0.0072
398.88	13.4033	2.04375	0	0.005	0	0	0	0.0343	0.008
399.766	13.7259	2.17144	0	0.004	0	0	0	0.035	0.0082
400.653	13.5863	2.15245	0.0001	0.0045	0	0	0	0.0337	0.0097
401.539	13.7753	2.18336	0	0.0033	0	0	0	0.0347	0.0113
402.426	13.8237	2.15995	0.0002	0.0049	0	0.0001	0	0.0372	0.0086
403.312	13.7823	2.14271	0	0.0036	0	0	0	0.0359	0.0105
404.198	13.7343	2.12745	0	0.0046	0	0	0	0.0369	0.0095
405.085	13.3325	2.03125	0.0002	0.0059	0.0001	0	0	0.0315	0.0072
405.971	13.3533	2.05394	0.0002	0.0044	0	0	0	0.0376	0.007
406.858	13.748	2.08041	0	0.0044	0.0002	0	0	0.0356	0.0075
407.744	13.5814	2.08405	0.0001	0.0045	0.0001	0.0001	0	0.0334	0.0077
408.63	13.333	2.0299	0	0.0035	0.0001	0	0	0.0311	0.0054
409.517	13.6691	2.07107	0.0002	0.0049	0.0001	0	0	0.0348	0.0066
410.403	12.9318	1.99708	0.0001	0.0094	0.0001	0	0	0.0347	0.0085
411.29	13.6299	2.14589	0.0002	0.0042	0	0	0	0.0373	0.008
412.176	13.5724	2.18982	0.0002	0.0047	0	0	0	0.0338	0.0107
413.062	13.0564	2.09689	0.0001	0.0059	0	0	0	0.0329	0.0084
413.949	13.233	2.06445	0.0003	0.005	0	0	0	0.0353	0.0103
414.835	13.6622	2.1056	0.0002	0.0036	0	0	0.0001	0.0381	0.0095
415.722	13.6282	2.0829	0.0001	0.0043	0	0	0	0.036	0.0081
416.608	13.554	2.06969	0.0001	0.005	0	0	0	0.0365	0.0085
417.494	13.5963	2.09304	0.0002	0.0038	0	0	0	0.0325	0.0078
418.381	13.5335	2.02879	0.0002	0.0052	0	0	0	0.0363	0.0067
419.267	13.1627	1.98654	0.0004	0.004	0	0	0	0.0331	0.0062
420.154	13.4178	2.02908	0	0.0035	0.0001	0	0	0.035	0.0078
421.04	13.6202	2.10835	0.0001	0.0035	0	0	0	0.0359	0.0089
421.926	13.3067	2.08944	0.0003	0.0044	0	0	0	0.0318	0.0083
422.813	13.6977	2.1356	0.0001	0.0038	0	0	0	0.0371	0.0094
423.699	13.5988	2.13934	0.0001	0.0055	0	0.0001	0	0.0389	0.0088
424.586	13.3375	2.02826	0.0004	0.0051	0	0	0	0.0348	0.0098
425.472	13.6309	2.09569	0	0.0047	0	0	0	0.0352	0.008
426.358	13.2761	2.03092	0.0002	0.0038	0.0001	0	0	0.0363	0.01
427.245	13.2291	1.99206	0.0001	0.0061	0	0	0	0.0337	0.0084
428.131	13.115	1.95358	0.0001	0.0041	0	0	0	0.0345	0.0082
429.018	13.3324	2.03338	0.0002	0.0034	0	0	0.0001	0.0318	0.005
429.904	13.5239	2.03177	0.0001	0.0039	0	0	0	0.033	0.0059
430.79	13.3512	2.03767	0.0001	0.0043	0.0001	0.0001	0	0.0359	0.0083
431.677	13.6776	2.06964	0	0.0051	0	0	0	0.0353	0.0074
432.563	13.6302	2.13808	0.0001	0.0034	0	0	0	0.0336	0.0093
433.45	13.3155	2.08667	0.0001	0.0036	0	0	0	0.0327	0.0094
434.336	13.6012	2.1448	0.0001	0.0041	0.0001	0	0	0.0335	0.01
435.222	13.5405	2.04173	0.0001	0.0041	0	0	0	0.0358	0.0092
436.109	13.5516	2.07842	0.0003	0.0035	0	0	0.0001	0.0337	0.0089
436.995	13.4784	2.1005	0	0.0043	0.0001	0	0	0.0337	0.009
437.882	13.2254	2.07591	0.0001	0.0057	0.0001	0	0	0.0332	0.0106
438.768	13.3177	2.00024	0.0002	0.0056	0.0001	0	0	0.0368	0.0065
439.654	13.4234	1.99872	0	0.0046	0.0001	0.0001	0	0.0328	0.0043
440.541	13.3817	1.96772	0.0001	0.0033	0	0	0	0.0323	0.0059
441.427	13.2956	1.99055	0.0001	0.0045	0	0	0	0.0322	0.0072
442.314	13.2947	2.00512	0	0.0043	0	0	0	0.0361	0.0067
443.2	12.9025	1.94866	0.0002	0.0041	0	0	0	0.0338	0.0075
444.086	13.4508	2.12191	0	0.0046	0	0	0	0.0333	0.0089
444.973	13.4522	2.1118	0.0001	0.0036	0	0	0	0.0348	0.0095
445.859	13.7129	2.09769	0	0.0041	0	0	0	0.0355	0.0098
446.746	13.6745	2.09362	0.0002	0.0042	0	0	0	0.0369	0.0097
447.632	13.5189	2.04508	0.0001	0.0033	0.0001	0	0	0.0338	0.0092
448.518	13.5429	2.04564	0.0002	0.0035	0.0002	0	0	0.0381	0.0096
449.405	13.3235	2.03923	0.0001	0.0039	0	0	0	0.035	0.009
450.291	13.4712	2.05051	0.0003	0.004	0	0	0	0.0342	0.0069
451.178	13.0183	2.01239	0.0001	0.0049	0	0	0	0.0336	0.0094
452.064	13.3866	2.03142	0	0.0034	0	0	0	0.0327	0.0056
452.95	13.2152	1.97077	0.0001	0.0043	0	0	0	0.0343	0.0054
453.837	13.1589	1.99281	0	0.0043	0	0	0	0.0325	0.0081
454.723	13.3734	2.10432	0.0002	0.0033	0	0	0	0.0334	0.0059
455.61	13.3731	2.12566	0.0002	0.0043	0	0	0	0.0345	0.0081
456.496	13.5026	2.09172	0	0.0037	0	0	0	0.0374	0.0104
457.382	13.5818	2.06814	0.0001	0.0045	0.0002	0	0	0.0328	0.0091
458.269	13.3699	2.02949	0	0.0026	0.0001	0	0.0001	0.0375	0.0097
459.155	12.955	1.97265	0.0002	0.0031	0	0	0	0.031	0.0108
460.042	13.3137	2.03669	0.0001	0.0052	0	0	0.0001	0.0358	0.0095
460.928	13.2153	1.96558	0.0001	0.0029	0	0	0	0.033	0.0063
461.814	13.197	1.95422	0.0001	0.0045	0.0001	0	0	0.0313	0.0083
462.701	13.1089	1.9618	0.0002	0.0048	0	0	0	0.0359	0.0078
463.587	13.0276	1.95858	0.0002	0.0038	0.0001	0	0	0.0347	0.007
464.474	13.0774	1.9455	0.0001	0.0033	0.0001	0	0	0.0377	0.005
465.36	13.2606	1.96947	0.0003	0.0043	0.0002	0	0.0001	0.0339	0.0057
466.246	13.138	2.00716	0.0001	0.0033	0	0	0	0.0342	0.0081
467.133	13.302	2.02361	0.0003	0.0051	0.0001	0	0	0.0341	0.0098
468.019	13.4718	2.06218	0	0.005	0	0	0	0.0369	0.0106
468.906	13.6357	2.04289	0.0003	0.0047	0	0	0	0.0334	0.0106
469.792	13.3449	2.04803	0.0001	0.0031	0	0	0	0.0347	0.0073
470.678	13.2995	2.01793	0.0002	0.0033	0	0	0	0.0314	0.0089
471.565	13.4285	1.98105	0.0002	0.0033	0	0	0	0.0386	0.0085
472.451	12.8945	1.92222	0.0003	0.0031	0.0001	0	0	0.0345	0.0092
473.338	13.2893	1.95983	0.0002	0.004	0.0001	0	0	0.0327	0.0082
474.224	12.9839	1.90384	0.0001	0.0044	0	0	0	0.0309	0.0088
475.11	13.1618	1.934	0.0001	0.0037	0	0	0	0.0297	0.0062
475.997	13.1831	1.96567	0.0001	0.0029	0	0.0001	0	0.031	0.0067
476.883	12.5719	1.8649	0.0001	0.0038	0	0.0001	0	0.0279	0.007
477.77	13.1398	2.03769	0	0.0045	0	0	0	0.0341	0.0078
478.656	13.1827	2.05894	0.0001	0.0045	0	0	0	0.0357	0.0093
479.542	13.3685	1.99037	0.0001	0.0045	0	0	0	0.0325	0.0105
480.429	13.2738	1.96912	0.0003	0.004	0.0001	0	0	0.0352	0.0091
481.315	13.146	1.91587	0	0.0048	0	0	0	0.0372	0.0076
482.202	12.9723	1.94332	0.0001	0.0046	0.0001	0	0	0.0315	0.0074
483.088	13.1792	1.95494	0.0004	0.0034	0	0	0	0.0381	0.0088
483.974	13.0957	1.94789	0	0.0035	0.0003	0	0	0.0318	0.0055
484.861	13.0679	1.95864	0.0001	0.0035	0	0	0	0.0305	0.0062
485.747	13.2065	1.92918	0.0001	0.0034	0	0	0	0.0329	0.0084
486.634	13.1794	1.99227	0.0001	0.0036	0	0	0	0.0328	0.0065
487.52	13.0888	1.97695	0.0001	0.0038	0	0	0	0.0324	0.0098
488.406	13.3161	2.04599	0.0001	0.0038	0	0	0	0.0348	0.007
489.293	13.2364	2.00006	0.0001	0.0024	0.0001	0	0	0.0347	0.0088
490.179	13.22	1.97832	0	0.0029	0	0	0	0.036	0.0089
491.066	12.9271	1.96729	0	0.0043	0	0	0	0.0341	0.0088
491.952	13.13	1.95053	0	0.0038	0.0001	0	0	0.0362	0.0077
492.838	13.02	1.89199	0.0003	0.0025	0	0	0	0.0329	0.0073
493.725	13.1474	1.93795	0.0002	0.0039	0	0	0	0.0336	0.0079
494.611	12.9578	1.87587	0	0.0029	0	0	0	0.0322	0.0071
495.498	13.0272	1.94782	0.0003	0.0039	0	0	0	0.0329	0.007
496.384	12.7041	1.87761	0.0001	0.0045	0	0	0	0.0301	0.0075
497.27	13.0166	1.95483	0	0.0042	0	0	0	0.0363	0.0059
498.157	13.0777	1.98542	0	0.0049	0	0	0	0.0331	0.0085
499.043	13.2896	2.01684	0.0001	0.003	0	0	0	0.0328	0.0092
499.93	13.3147	2.03371	0	0.0042	0	0	0	0.0333	0.0091
500.816	13.2715	2.00041	0.0001	0.0037	0	0	0	0.0356	0.0079
501.702	13.0787	1.9633	0	0.0032	0	0	0	0.0343	0.0094
502.589	12.9227	1.95897	0	0.0035	0	0.0001	0	0.0327	0.0081
503.475	12.8738	1.88116	0	0.0037	0.0001	0	0	0.0295	0.0099
504.362	13.116	1.92606	0.0001	0.0038	0	0	0	0.0305	0.0085
505.248	12.8289	1.89256	0.0001	0.0048	0	0	0.0001	0.0334	0.0058
506.134	13.1702	1.89704	0	0.004	0	0	0	0.0312	0.0083
507.021	13.0184	1.94188	0	0.0032	0.0001	0	0	0.0318	0.0091
507.907	13.0178	1.91566	0.0001	0.0037	0	0	0	0.0318	0.0064
508.794	13.1078	1.95135	0.0002	0.0036	0	0	0	0.0347	0.0071
509.68	13.205	1.94691	0.0002	0.0036	0	0	0	0.0354	0.0089
510.566	13.0964	1.94708	0.0001	0.0042	0	0	0	0.0376	0.0075
511.453	13.2429	1.93811	0.0002	0.0032	0.0001	0	0	0.0361	0.0089
512.339	13.0214	1.92064	0.0002	0.0037	0.0001	0	0.0001	0.033	0.0075
513.226	13.0476	1.93602	0.0001	0.0025	0	0	0	0.0324	0.0065
514.112	12.9696	1.93994	0.0001	0.0041	0	0	0	0.0316	0.0063
514.998	12.2697	1.79611	0	0.0068	0.0001	0	0	0.0315	0.0074
515.885	12.6122	1.90138	0.0003	0.0037	0.0001	0	0	0.0328	0.0066
516.771	12.9768	1.90449	0.0001	0.0032	0	0	0	0.035	0.0078
517.658	13.0182	1.92772	0.0002	0.0037	0.0001	0	0	0.0317	0.0075
518.544	13.112	1.9109	0	0.0034	0	0	0	0.0328	0.0088
519.43	13.0324	1.93705	0	0.0043	0	0.0001	0	0.0321	0.0084
520.317	13.1274	1.93279	0.0002	0.0028	0	0	0	0.0331	0.0075
521.203	13.056	1.99389	0.0001	0.0029	0	0	0	0.0353	0.0084
522.09	13.0634	1.92048	0	0.0028	0	0	0	0.0344	0.0099
522.976	13.1985	1.94933	0	0.0027	0.0002	0	0	0.0313	0.0096
523.862	12.9593	1.91229	0	0.0032	0.0001	0	0.0001	0.0369	0.0078
524.749	12.8384	1.88265	0	0.0027	0	0	0	0.0303	0.0077
525.635	12.8495	1.87803	0	0.0044	0	0	0	0.0357	0.0071
526.522	12.8912	1.8914	0.0002	0.005	0	0	0	0.0338	0.0088
527.408	12.6346	1.86044	0.0001	0.0045	0	0	0	0.0322	0.0074
528.294	12.7374	1.88556	0.0001	0.0031	0	0	0	0.0335	0.009
529.181	12.9195	1.8902	0.0004	0.0034	0	0	0	0.0328	0.0074
530.067	12.9166	1.94584	0	0.0031	0	0	0	0.0346	0.0076
530.954	12.6941	1.90812	0.0001	0.0026	0	0	0	0.0341	0.0081
531.84	13.0328	1.97251	0.0001	0.0044	0	0	0	0.034	0.0094
