# Supplementary material for: Depth profiling of noble gases in ilmenite and olivine substrates
Source: Royal Society of Chemistry journal article supplement (doi:10.1039/d4ja00430b), 2025-01-01
Supplement: d4ja00430b4.xlsx [file d4ja00430b4.xlsx]

## Sheet: Sheet1
	Table S3 RSFs from 11 HNA-IL measurements.
		RSFiM /×1022 cm−3						RSFi,j
	#	4He+	20Ne2+	22Ne2+	36Ar4+	40Ar4+		4,20	20,36	20,22
	1	2.11	1.88	1.4	1.36	1.66		1.19	1.37	1.34
	2	2.93	1.66	1.58	1.4	1.55		1.83	1.12	0.95
	3	3.03	1.04	1.02	1.12	0.96		3.15	0.93	1.03
	4	1.98	1.25	1.26	1.09	1.13		1.67	1.13	0.97
	5	2.6	1.51	1.25	1.31	1.37		1.83	1.15	1.21
	6	1.87	1.13	1.15	0.93	1.07		1.86	1.19	0.99
	7	2.15	1.06	1.17	0.84	0.95		2.15	1.25	0.91
	8	2.01	1.15	1.17	1.14	1.04		1.84	1	0.99
	9	1.86	0.84	0.75	0.82	0.72		2.3	1.02	1.12
	10	2.74	1.1	0.97	0.98	1.12		2.88	1.13	1.13
	11	3.03	0.93	0.79	0.94	0.85		3.38	1	1.17
	Average	2.39	1.23	1.14	1.09	1.13		2.19	1.12	1.07
	1SD (%)	20	26	22	19	26		31	11	12
